# Supplementary material for: Experimental Evaluation of Perfluorocarbon Aerosol Generation with Two Novel Nebulizer Prototypes
Source: MDPI journal article supplement (doi:10.3390/pharmaceutics11010019), 2019-01-05
Supplement: s1 [file s1]

## Supplementary Materials: Experimental Evaluation of Perfluorocarbon Aerosol Generation with Two Novel Nebulizer Prototypes

Iñigo Aramendia, Unai Fernandez-Gamiz, Alberto Lopez-Arraiza, Carmen Rey-Santano, Victoria Mielgo, Francisco Jose Basterretxea, Javier Sancho and Miguel Angel Gomez-Solaetxe

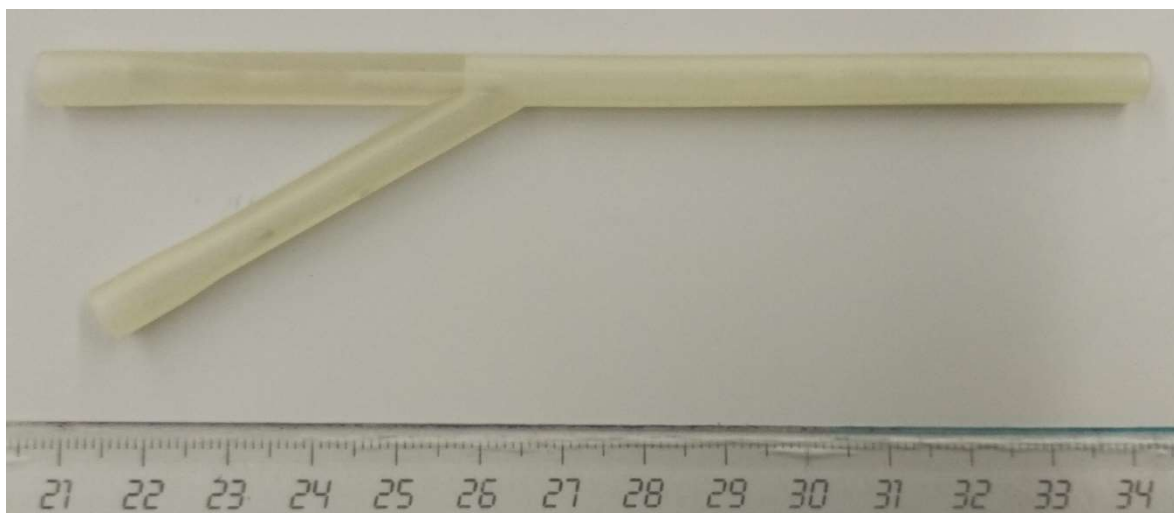

**Figure S1.** Representation of the nebulizer prototype 2.

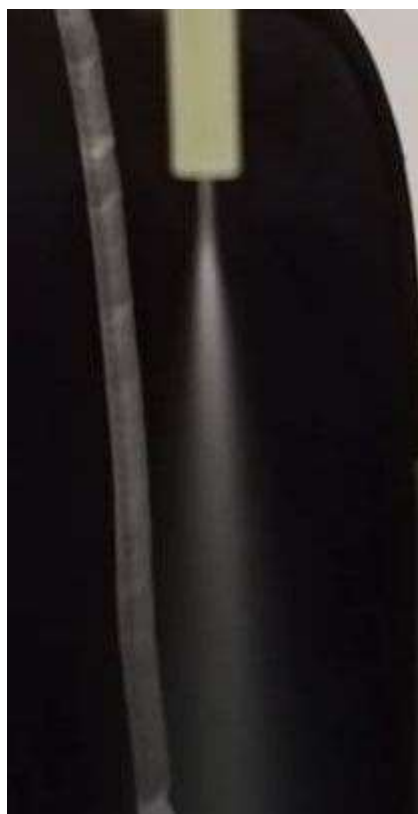

**Figure S2.** Nebulization example with prototype 2.

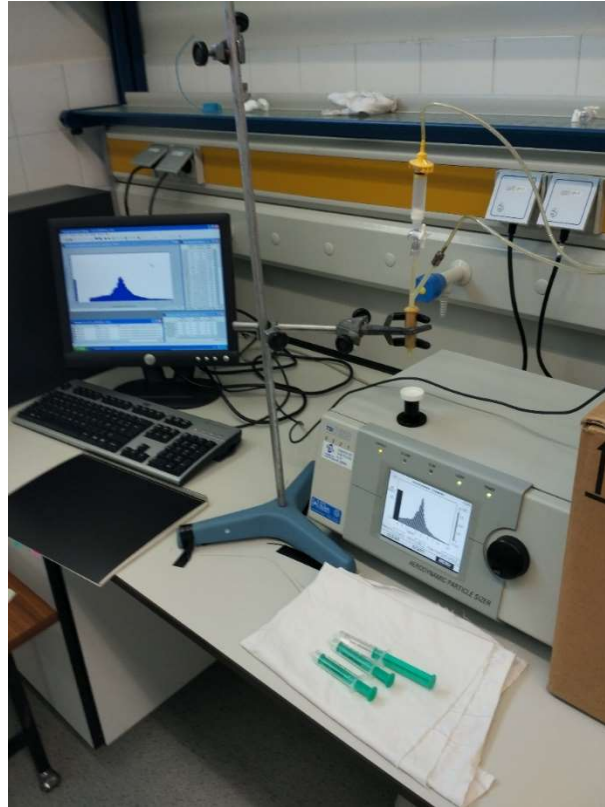

**Figure S3.** Experimental setup placed in the laboratory for the nebulization with both prototypes.

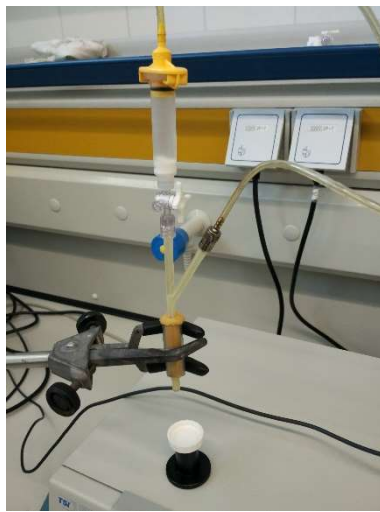

**(a)**

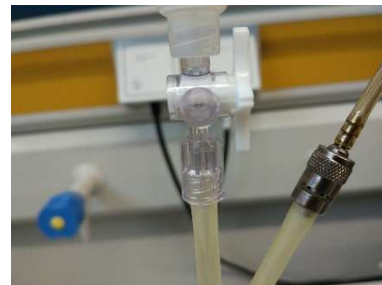

**(b)**

**Figure S4.** (a) Setup of the nebulizer with the liquid chamber where the liquid is supplied and (b) detail of the connections to administer the compressed air and the liquid respectively.
